# Supplementary material for: The Administration of Hyaluronic Acid into the Temporomandibular Joints’ Cavities Increases the Mandible’s Mobility: A Systematic Review and Meta-Analysis
Source: MDPI journal article supplement (doi:10.3390/jcm11071901), 2022-03-29
Supplement: s1 [file s1]

| Title                                                                                                                                                                                                                                                     | Year | Authors                                                                                             | Screening                                                                                 | Eligibility                                                                           |
|-----------------------------------------------------------------------------------------------------------------------------------------------------------------------------------------------------------------------------------------------------------|------|-----------------------------------------------------------------------------------------------------|-------------------------------------------------------------------------------------------|---------------------------------------------------------------------------------------|
| Management of Internal Disc Derangement Using Normal Saline and Sodium Hyaluronate: A Comparative Study.                                                                                                                                                  | 2021 | Singh N and Dubey SK and Bhanawat N and Rai G and Kumar A and Vatsa R                               | "M.C.": "Excluded",<br>"K.C.": "Excluded",<br>Exclusion reason:<br>wrong drug             | Not applicable                                                                        |
| [Clinical example of complex diagnostic and treatment of patient with temporomandibular joint internal derangements with arthroscopic surgery].                                                                                                           | 2021 | Shipika DV and Ostashko AA and Burenchev DV and Lyan DV and Drobyshev AU                            | "M.C.": "Excluded",<br>"K.C.": "Excluded",<br>Exclusion reason:<br>foreign language       | Not applicable                                                                        |
| Double-Needle Arthrocentesis with Viscosupplementation in Patients with Temporomandibular Joint Disc Displacement without Reduction.                                                                                                                      | 2021 | Rossini R and Grossmann E and Poluha RL and Setogutti ET and Dos Santos MF                          | "M.C.": "Excluded",<br>"K.C.": "Excluded",<br>Exclusion reason:<br>wrong drug             | Not applicable                                                                        |
| Evaluation of the participation of hyaluronic acid with platelet-rich plasma in the treatment of temporomandibular joint disorders.                                                                                                                       | 2021 | Harba AN and Harfoush M                                                                             | "M.C.": "Included",<br>"K.C.": "Included"                                                 | "M.C.": "Included",<br>"K.C.": "Included"                                             |
| The efficacy of intra-articular injectable platelet-rich fibrin application in the management of Wilkes stage III temporomandibular joint internal derangement.                                                                                           | 2021 | Torul D and Cezairli B and Kahveci K                                                                | "M.C.": "Excluded",<br>"K.C.": "Excluded",<br>Exclusion reason:<br>wrong drug             | Not applicable                                                                        |
| Therapeutic Effect of Sodium Hyaluronate and Corticosteroid Injections on Pain and Temporomandibular Joint Dysfunction: A Quasi-experimental Study.                                                                                                       | 2020 | Romero-Tapia P and Pérez-Vargas F and Sedano-Balbin G and Marín J and Mayta-Tovalino F              | "M.C.": "Included",<br>"K.C.": "Included"                                                 | "M.C.": "Included",<br>"K.C.": "Included"                                             |
| Does glucosamine, chondroitin sulfate, and methylsulfonylmethane supplementation improve the outcome of temporomandibular joint osteoarthritis management with arthrocentesis plus intraarticular hyaluronic acid injection. A randomized clinical trial. | 2021 | Cömert Kılıç S                                                                                      | "M.C.": "Excluded",<br>"K.C.": "Excluded",<br>Exclusion reason:<br>wrong drug             | Not applicable                                                                        |
| Temporomandibular Joint Arthrocentesis and Microfragmented Adipose Tissue Injection for the Treatment of Internal Derangement and Osteoarthritis: A Randomized Clinical Trial.                                                                            | 2021 | Sembronio S and Tel A and Tremolada C and Lazzarotto A and Isola M and Robiony M                    | "M.C.": "Excluded",<br>"K.C.": "Excluded",<br>Exclusion reason:<br>wrong drug             | Not applicable                                                                        |
| Is there a difference in treatment effect of different intra-articular drugs for temporomandibular joint osteoarthritis? A systematic review of randomized controlled trials.                                                                             | 2021 | Liapaki A and Thamm JR and Ha S and Monteiro JLGC and McCain JP and Troulis MJ and Guastaldi FPS    | "M.C.": "Excluded",<br>"K.C.": "Excluded",<br>Exclusion reason:<br>wrong publication type | Not applicable                                                                        |
| Arthrocentesis and Sodium Hyaluronate Infiltration in Temporomandibular Disorders Treatment. Clinical and MRI Evaluation.                                                                                                                                 | 2020 | Santagata M and De Luca R and Lo Giudice G and Troiano A and Lo Giudice G and Corvo G and Tartaro G | "M.C.": "Excluded",<br>"K.C.": "Excluded",<br>Exclusion reason:<br>wrong drug             | Not applicable                                                                        |
| Treatment of Temporomandibular Joint Arthritis with Triamcinolone Acetonide and Hyaluronic Acid Injection: An Observational Study.                                                                                                                        | 2020 | Singh J and Bhardwaj B                                                                              | "M.C.": "Excluded",<br>"K.C.": "Excluded",<br>Exclusion reason:<br>wrong drug             | Not applicable                                                                        |
| Is arthrocentesis plus hyaluronic acid superior to arthrocentesis alone in the treatment of disc displacement without reduction in patients with bruxism?                                                                                                 | 2020 | Hosgor H                                                                                            | "M.C.": "Excluded",<br>"K.C.": "Excluded",<br>Exclusion reason:<br>wrong drug             | Not applicable                                                                        |
| Synovial fluid levels of VEGF and FGF-2 before and after intra-articular injection of hyaluronic acid in patients with temporomandibular disorders: a short-term study.                                                                                   | 2021 | Wang XW and Fang W and Li YJ and Long X and Cai HX                                                  | "M.C.": "Included",<br>"K.C.": "Included"                                                 | "M.C.": "Excluded",<br>"K.C.": "Excluded",<br>Exclusion reason:<br>wrong intervention |
| TMJ arthroscopy with hyaluronic acid: A 12-month randomized clinical trial.                                                                                                                                                                               | 2021 | Castañó-Joaqui OG and Cano-Sánchez J and Campo-Trapero J and Muñoz-Guerra MF                        | "M.C.": "Excluded",<br>"K.C.": "Included"                                                 | "M.C.": "Excluded",<br>"K.C.": "Excluded",<br>Exclusion reason:<br>wrong intervention |
| Short-Term Effects of Intra-Articular Hyaluronic Acid Administration in Patients with Temporomandibular Joint Disorders.                                                                                                                                  | 2020 | Sikora M and Czerwińska-Niezabitowska B and Chęciński MA and Sielski M and Chlubek D                | "M.C.": "Included",<br>"K.C.": "Included"                                                 | "M.C.": "Included",<br>"K.C.": "Included"                                             |
| Platelet Concentrate Treatments for Temporomandibular Disorders: A Systematic Review and Meta-analysis.                                                                                                                                                   | 2021 | Al-Hamed FS and Hijazi A and Gao Q and Badran Z and Tamimi F                                        | "M.C.": "Excluded",<br>"K.C.": "Excluded",<br>Exclusion reason:<br>wrong publication type | Not applicable                                                                        |
| Comparison of the Efficacy of Intra-Articular Injection of Liquid Platelet-Rich Fibrin and Hyaluronic Acid After in Conjunction With Arthrocentesis for the Treatment of Internal Temporomandibular Joint Derangements.                                   | 2020 | Yuce E and Komerik N                                                                                | "M.C.": "Excluded",<br>"K.C.": "Excluded",<br>Exclusion reason:<br>wrong drug             | Not applicable                                                                        |

|                                                                                                                                                                                    |      |                                                                                                                                     |                                                                                           |                                                                                       |
|------------------------------------------------------------------------------------------------------------------------------------------------------------------------------------|------|-------------------------------------------------------------------------------------------------------------------------------------|-------------------------------------------------------------------------------------------|---------------------------------------------------------------------------------------|
| Hyaluronic acid application vs arthroscopy in treatment of internal temporomandibular joint disorders.                                                                             | 2020 | Stasko J and Statelova D and Janickova M and Mikuskova K and Bacinsky M and Sokol J and Frlickova Z and Hvizdos D and Malachovsky I | "M.C.": "Included",<br>"K.C.": "Included"                                                 | "M.C.": "Included",<br>"K.C.": "Included"                                             |
| Different Treatments in Patients with Temporomandibular Joint Disorders: A Comparative Randomized Study.                                                                           | 2020 | Macedo De Sousa BM and López-Valverde N and López-Valverde A and Caramelo F and Fraile JF and Payo JH and Rodrigues MJ              | "M.C.": "Included",<br>"K.C.": "Included"                                                 | "M.C.": "Included",<br>"K.C.": "Included"                                             |
| The hierarchy of different treatments for arthrogenous temporomandibular disorders: A network meta-analysis of randomized clinical trials.                                         | 2020 | Al-Moraissi EA and Wolford LM and Ellis E 3rd and Neff A                                                                            | "M.C.": "Excluded",<br>"K.C.": "Excluded",<br>Exclusion reason:<br>wrong publication type | Not applicable                                                                        |
| Comparison of efficacy of sodium hyaluronate and normal saline arthrocentesis in the management of internal derangement of temporomandibular joints - A prospective study.         | 2019 | Rao JKD and Sharma A and Kashyap R and Walecha K and Siwach V and Arya V                                                            | "M.C.": "Excluded",<br>"K.C.": "Excluded",<br>Exclusion reason:<br>wrong drug             | Not applicable                                                                        |
| Multiple Treatment Meta-Analysis of Intra-Articular Injection for Temporomandibular Osteoarthritis.                                                                                | 2020 | Liu Y and Wu JS and Tang YL and Tang YJ and Fei W and Liang XH                                                                      | "M.C.": "Excluded",<br>"K.C.": "Excluded",<br>Exclusion reason:<br>wrong publication type | Not applicable                                                                        |
| Bone marrow nucleated cell concentrate autograft in temporomandibular joint degenerative disorders: 1-year results of a randomized clinical trial.                                 | 2019 | De Riu G and Vaira LA and Carta E and Meloni SM and Sembronio S and Robiony M                                                       | "M.C.": "Excluded",<br>"K.C.": "Excluded",<br>Exclusion reason:<br>wrong drug             | Not applicable                                                                        |
| Comparison of treatment efficacy between hyaluronic acid and arthrocentesis plus hyaluronic acid in internal derangements of temporomandibular joint.                              | 2019 | Yilmaz O and Korkmaz YT and Tuzuner T                                                                                               | "M.C.": "Included",<br>"K.C.": "Included"                                                 | "M.C.": "Included",<br>"K.C.": "Included"                                             |
| Intra-articular injection of a mixture of hyaluronic acid and corticosteroid versus arthrocentesis in TMJ internal derangement.                                                    | 2020 | Marzook HAM and Abdel Razeq AA and Yousef EA and Attia AAMM                                                                         | "M.C.": "Excluded",<br>"K.C.": "Excluded",<br>Exclusion reason:<br>wrong drug             | Not applicable                                                                        |
| Evaluation of success criteria for temporomandibular joint arthrocentesis.                                                                                                         | 2019 | Yilmaz O and Candirli C and Balaban E and Demirkol M                                                                                | "M.C.": "Excluded",<br>"K.C.": "Excluded",<br>Exclusion reason:<br>wrong drug             | Not applicable                                                                        |
| Long-term effectiveness of arthrocentesis with and without hyaluronic acid injection for treatment of temporomandibular joint osteoarthritis.                                      | 2019 | Bergstrand S and Ingstad HK and Møystad A and Bjørnland T                                                                           | "M.C.": "Excluded",<br>"K.C.": "Excluded",<br>Exclusion reason:<br>wrong drug             | Not applicable                                                                        |
| Efficacy of Sodium Hyaluronate for Temporomandibular Joint Disorder by Single-Puncture Arthrocentesis.                                                                             | 2019 | Sequeira J and Rao BHS and Kedia PR                                                                                                 | "M.C.": "Excluded",<br>"K.C.": "Excluded",<br>Exclusion reason:<br>wrong drug             | Not applicable                                                                        |
| Use of platelet-rich plasma, platelet-rich growth factor with arthrocentesis or arthroscopy to treat temporomandibular joint osteoarthritis: Systematic review with meta-analyses. | 2018 | Haigler MC and Abdulrehman E and Siddappa S and Kishore R and Padilla M and Enciso R                                                | "M.C.": "Excluded",<br>"K.C.": "Excluded",<br>Exclusion reason:<br>wrong publication type | Not applicable                                                                        |
| Evaluation of Effect of Glucosamine-Chondroitin Sulfate, Tramadol, and Sodium Hyaluronic Acid on Expression of Cytokine Levels in Internal Derangement of Temporomandibular Joint. | 2018 | Ganti S and Shriram P and Ansari AS and Kapadia JM and Azad A and Dubey A                                                           | "M.C.": "Included",<br>"K.C.": "Included"                                                 | "M.C.": "Excluded",<br>"K.C.": "Excluded",<br>Exclusion reason:<br>wrong intervention |
| Platelet-Rich Plasma in Treatment of Temporomandibular Joint Dysfunctions: Narrative Review.                                                                                       | 2019 | Zotti F and Albanese M and Rodella LF and Nocini PF                                                                                 | "M.C.": "Excluded",<br>"K.C.": "Excluded",<br>Exclusion reason:<br>wrong publication type | Not applicable                                                                        |
| Effectiveness of platelet-rich plasma injection in patients with temporomandibular joint osteoarthritis: a systematic review and meta-analysis of randomized controlled trials.    | 2019 | Chung PY and Lin MT and Chang HP                                                                                                    | "M.C.": "Excluded",<br>"K.C.": "Excluded",<br>Exclusion reason:<br>wrong publication type | Not applicable                                                                        |
| [Intra-articular steroid and hyaluronic acid treatment of internal derangement of the temporomandibular joint].                                                                    | 2018 | Vingender S and Restár L and Csomó KB and Schmidt P and Hermann P and Vaszilkó M                                                    | "M.C.": "Excluded",<br>"K.C.": "Excluded",<br>Exclusion reason:<br>foreign language       | Not applicable                                                                        |

|                                                                                                                                                                                                                                                                  |      |                                                                                                                                                     |                                                                                           |                                                                                                                                       |
|------------------------------------------------------------------------------------------------------------------------------------------------------------------------------------------------------------------------------------------------------------------|------|-----------------------------------------------------------------------------------------------------------------------------------------------------|-------------------------------------------------------------------------------------------|---------------------------------------------------------------------------------------------------------------------------------------|
| Effectiveness of Sequential Viscosupplementation in Temporomandibular Joint Internal Derangements and Symptomatology: A Case Series.                                                                                                                             | 2018 | Fonseca RMDFB and Januzzi E and Ferreira LA and Grossmann E and Carvalho ACP and de Oliveira PG and Vieira ÉLM and Teixeira AL and Almeida-Leite CM | "M.C.": "Included",<br>"K.C.": "Included"                                                 | "M.C.": "Included",<br>"K.C.": "Included"                                                                                             |
| Prediction Models for Oral Health-Related Quality of Life in Patients with Temporomandibular Joint Osteoarthritis 1 and 6 Months After Arthrocentesis with Hyaluronic Acid Injections.                                                                           | 2019 | Su N and Wang H and van Wijk AJ and Visscher CM and Lobbezoo F and Shi Z and van der Heijden GJMG                                                   | "M.C.": "Excluded",<br>"K.C.": "Excluded",<br>Exclusion reason:<br>wrong drug             | Not applicable                                                                                                                        |
| Clinical Outcome of Sodium Hyaluronate Injection into the Superior and Inferior Joint Space for Osteoarthritis of the Temporomandibular Joint Evaluated by Cone-Beam Computed Tomography: A Retrospective Study of 51 Patients and 56 Joints.                    | 2018 | Sun H and Su Y and Song N and Li C and Shi Z and Li L                                                                                               | "M.C.": "Included",<br>"K.C.": "Included"                                                 | "M.C.": "Excluded",<br>"K.C.": "Excluded",<br>Exclusion reason:<br>wrong intervention                                                 |
| Effect of intra-articular Botulinum toxin injections on temporo-mandibular joint pain.                                                                                                                                                                           | 2018 | Batifol D and Huart A and Finiels PJ and Nagot N and Jammet P                                                                                       | "M.C.": "Excluded",<br>"K.C.": "Excluded",<br>Exclusion reason:<br>wrong drug             | Not applicable                                                                                                                        |
| Oral Glucosamine Hydrochloride Combined With Hyaluronate Sodium Intra-Articular Injection for Temporomandibular Joint Osteoarthritis: A Double-Blind Randomized Controlled Trial.                                                                                | 2018 | Yang W and Liu W and Miao C and Sun H and Li L and Li C                                                                                             | "M.C.": "Included",<br>"K.C.": "Included"                                                 | "M.C.": "Included",<br>"K.C.": "Included"                                                                                             |
| A comparison of the effects of Methylprednisolone Acetate, Sodium Hyaluronate and Tenoxicam in the treatment of non-reducing disc displacement of the temporomandibular joint.                                                                                   | 2018 | Yapici-Yavuz G and Şimşek-Kaya G and Oğul H                                                                                                         | "M.C.": "Excluded",<br>"K.C.": "Excluded",<br>Exclusion reason:<br>wrong drug             | Not applicable                                                                                                                        |
| Is There a Difference in Intra-Articular Injections of Corticosteroids, Hyaluronate, or Placebo for Temporomandibular Osteoarthritis?                                                                                                                            | 2018 | Liu Y and Wu J and Fei W and Cen X and Xiong Y and Wang S and Tang Y and Liang X                                                                    | "M.C.": "Excluded",<br>"K.C.": "Excluded",<br>Exclusion reason:<br>wrong publication type | Not applicable                                                                                                                        |
| Platelet-rich plasma for the therapeutic management of temporomandibular joint disorders: a systematic review.                                                                                                                                                   | 2018 | Bousnaki M and Bakopoulou A and Koidis P                                                                                                            | "M.C.": "Excluded",<br>"K.C.": "Excluded",<br>Exclusion reason:<br>wrong publication type | Not applicable                                                                                                                        |
| Efficacy of Temporomandibular Joint Arthrocentesis with Sodium Hyaluronate in the Management of Temporomandibular Joint Disorders: A Prospective Randomized Control Trial.                                                                                       | 2017 | Gorrela H and Prameela J and Srinivas G and Reddy BVB and Sudhir M and Arakeri G                                                                    | "M.C.": "Excluded",<br>"K.C.": "Excluded",<br>Exclusion reason:<br>wrong drug             | Not applicable                                                                                                                        |
| Glucosamine oral administration as an adjunct to hyaluronic acid injection in treating temporomandibular joint osteoarthritis.                                                                                                                                   | 2018 | Cen X and Liu Y and Wang S and Yang X and Shi Z and Liang X                                                                                         | "M.C.": "Included",<br>"K.C.": "Included"                                                 | "M.C.": "Excluded",<br>"K.C.": "Excluded",<br>Exclusion reason:<br>repetition of patient data from another article (Yang et al. 2018) |
| Efficacy of arthrocentesis versus arthrocentesis with sodium hyaluronic acid in temporomandibular joint osteoarthritis: A comparison.                                                                                                                            | 2017 | Gurung T and Singh RK and Mohammad S and Pal US and Mahdi AA and Kumar M                                                                            | "M.C.": "Excluded",<br>"K.C.": "Excluded",<br>Exclusion reason:<br>wrong drug             | Not applicable                                                                                                                        |
| Age, gender and parafunctional habits as prognostic factors for temporomandibular joint arthrocentesis.                                                                                                                                                          | 2018 | Attia HS and Mosleh MI and Jan AM and Shawky MM and Jadu FM                                                                                         | "M.C.": "Excluded",<br>"K.C.": "Excluded",<br>Exclusion reason:<br>wrong drug             | Not applicable                                                                                                                        |
| Comparison of intra-articular injection of plasma rich in growth factors versus hyaluronic acid following arthroscopy in the treatment of temporomandibular dysfunction: A randomised prospective study.                                                         | 2017 | Fernández-Ferro M and Fernández-Sanromán J and Blanco-Carrión A and Costas-López A and López-Betancourt A and Arenaz-Bua J and Stavaru Marinescu B  | "M.C.": "Included",<br>"K.C.": "Included"                                                 | "M.C.": "Excluded",<br>"K.C.": "Excluded",<br>Exclusion reason:<br>wrong intervention                                                 |
| The impact of arthrocentesis with and without hyaluronic acid injection in the prognosis and synovial fluid myeloperoxidase levels of patients with painful symptomatic internal derangement of temporomandibular joint: a randomised controlled clinical trial. | 2017 | Ozdamar SM and Alev B and Yarat A                                                                                                                   | "M.C.": "Excluded",<br>"K.C.": "Excluded",<br>Exclusion reason:<br>wrong drug             | Not applicable                                                                                                                        |
| Sodium hyaluronate: an effective adjunct in temporomandibular joint arthrocentesis.                                                                                                                                                                              | 2016 | Patel P and Idrees F and Newaskar V and Agrawal D                                                                                                   | "M.C.": "Excluded",<br>"K.C.": "Excluded",<br>Exclusion reason:<br>wrong drug             | Not applicable                                                                                                                        |

|                                                                                                                                                                                                                                                         |      |                                                                                                                 |                                                                                           |                                                                                       |
|---------------------------------------------------------------------------------------------------------------------------------------------------------------------------------------------------------------------------------------------------------|------|-----------------------------------------------------------------------------------------------------------------|-------------------------------------------------------------------------------------------|---------------------------------------------------------------------------------------|
| [Different types of injection in temporomandibular disorders (TMD) treatment].                                                                                                                                                                          | 2016 | Batifol D                                                                                                       | "M.C.": "Excluded",<br>"K.C.": "Excluded",<br>Exclusion reason:<br>foreign language       | Not applicable                                                                        |
| [Arthrocentesis of the temporomandibular joint and intra-articular injections : An update].                                                                                                                                                             | 2016 | Marty P and Louvrier A and Weber E and Dubreuil PA and Chatelain B and Meyer C                                  | "M.C.": "Excluded",<br>"K.C.": "Excluded",<br>Exclusion reason:<br>foreign language       | Not applicable                                                                        |
| Removal of a Solitary Synovial Chondromatosis of the Temporomandibular Joint Using Arthroscopy.                                                                                                                                                         | 2016 | Pastore GP and Goulart DR and Pastore PR and Prati AJ                                                           | "M.C.": "Excluded",<br>"K.C.": "Excluded",<br>Exclusion reason:<br>wrong publication type | Not applicable                                                                        |
| Is Hyaluronic Acid Injection Effective for the Treatment of Temporomandibular Joint Disc Displacement With Reduction?                                                                                                                                   | 2016 | Korkmaz YT and Altıntas NY and Korkmaz FM and Candırlı C and Coskun U and Durmuslar MC                          | "M.C.": "Included",<br>"K.C.": "Included"                                                 | "M.C.": "Included",<br>"K.C.": "Included"                                             |
| Long-Term Outcome of Arthrocentesis Plus Hyaluronic Acid Injection in Patients With Wilkes Stage II and III Temporomandibular Joint Internal Derangement.                                                                                               | 2015 | Ungor C and Atasoy KT and Taskesen F and Pirpir C and Yilmaz O                                                  | "M.C.": "Excluded",<br>"K.C.": "Excluded",<br>Exclusion reason:<br>wrong drug             | Not applicable                                                                        |
| [Effect of articular cavity injection for patients with temporomandibular joint osteoarthritis at different ages].                                                                                                                                      | 2015 | Li T and Li G                                                                                                   | "M.C.": "Excluded",<br>"K.C.": "Excluded",<br>Exclusion reason:<br>foreign language       | Not applicable                                                                        |
| Joint cavity injection combined with manual reduction and stabilization splint treatment of anterior disc displacement.                                                                                                                                 | 2015 | Liu J and Mu H and Wang Z and Lan J and Zhang S and Long X and Zhang D                                          | "M.C.": "Included",<br>"K.C.": "Included"                                                 | "M.C.": "Excluded",<br>"K.C.": "Excluded",<br>Exclusion reason:<br>wrong intervention |
| Comparison Between Betamethasone and Sodium Hyaluronate Combination with Betamethasone Alone After Arthrocentesis in the Treatment of Internal Derangement of TMJ-Using Single Puncture Technique: A Preliminary Study.                                 | 2015 | Giraddi GB and Siddaraju A and Kumar A and Jain T                                                               | "M.C.": "Excluded",<br>"K.C.": "Excluded",<br>Exclusion reason:<br>wrong drug             | Not applicable                                                                        |
| Platelet-Rich Plasma Injection as an Effective Treatment for Temporomandibular Joint Osteoarthritis.                                                                                                                                                    | 2015 | Hegab AF and Ali HE and Elmasry M and Khallaf MG                                                                | "M.C.": "Included",<br>"K.C.": "Included"                                                 | "M.C.": "Excluded",<br>"K.C.": "Excluded",<br>Exclusion reason:<br>wrong intervention |
| Osteoarthritic changes after superior and inferior joint space injection of hyaluronic acid for the treatment of temporomandibular joint osteoarthritis with anterior disc displacement without reduction: a cone-beam computed tomographic evaluation. | 2015 | Li C and Long X and Deng M and Li J and Cai H and Meng Q                                                        | "M.C.": "Included",<br>"K.C.": "Included"                                                 | "M.C.": "Included",<br>"K.C.": "Included"                                             |
| Comparative treatment outcomes of menopausal and nonmenopausal women after arthrocentesis.                                                                                                                                                              | 2014 | Ungor C and Cezairli B and Taskesen F and Dayısoylu EH and Cizmeci Senel F                                      | "M.C.": "Excluded",<br>"K.C.": "Excluded",<br>Exclusion reason:<br>wrong drug             | Not applicable                                                                        |
| [Treatment of temporomandibular joint disc perforation with injection of hyaluronic acid or disc repair].                                                                                                                                               | 2014 | Lu J and Long X and Deng M and Cheng Y and Li B                                                                 | "M.C.": "Excluded",<br>"K.C.": "Excluded",<br>Exclusion reason:<br>foreign language       | Not applicable                                                                        |
| Effectiveness of treatment with viscosupplementation in temporomandibular joints with or without effusion.                                                                                                                                              | 2014 | Guarda-Nardini L and Rossi A and Ramonda R and Punzi L and Ferronato G and Manfredini D                         | "M.C.": "Included",<br>"K.C.": "Included"                                                 | "M.C.": "Excluded",<br>"K.C.": "Excluded",<br>Exclusion reason:<br>wrong intervention |
| A comparative study on the impact of intra-articular injections of hyaluronic acid, tenoxicam and betametazon on the relief of temporomandibular joint disorder complaints.                                                                             | 2014 | Gencer ZK and Özkiriş M and Okur A and Korkmaz M and Saydam L                                                   | "M.C.": "Included",<br>"K.C.": "Included"                                                 | "M.C.": "Excluded",<br>"K.C.": "Excluded",<br>Exclusion reason:<br>wrong outcome      |
| Arthrocentesis and temporomandibular joint disorders: clinical and radiological results of a prospective study.                                                                                                                                         | 2013 | De Riu G and Stimolo M and Meloni SM and Soma D and Pisano M and Sembroni S and Tullio A                        | "M.C.": "Excluded",<br>"K.C.": "Excluded",<br>Exclusion reason:<br>wrong drug             | Not applicable                                                                        |
| Internal derangement of temporomandibular joint: an evaluation of effect of corticosteroid injection compared with injection of sodium hyaluronate after arthrocentesis.                                                                                | 2012 | Giraddi GB and Siddaraju A and Kumar B and Singh C                                                              | "M.C.": "Excluded",<br>"K.C.": "Excluded",<br>Exclusion reason:<br>wrong drug             | Not applicable                                                                        |
| The next step in the treatment of persistent temporomandibular joint pain following arthrocentesis: a retrospective study of 18 cases.                                                                                                                  | 2014 | Emes Y and Arpınar IŞ and Oncü B and Aybar B and Aktaş I and Al Badri N and Atalay B and İşsever H and Yalçın S | "M.C.": "Excluded",<br>"K.C.": "Excluded",<br>Exclusion reason:<br>wrong drug             | Not applicable                                                                        |

|                                                                                                                                                                                                                            |      |                                                                                             |                                                                                              |                                           |
|----------------------------------------------------------------------------------------------------------------------------------------------------------------------------------------------------------------------------|------|---------------------------------------------------------------------------------------------|----------------------------------------------------------------------------------------------|-------------------------------------------|
| Epidemiology, diagnosis, and treatment of temporomandibular disorders.                                                                                                                                                     | 2013 | Liu F and Steinkeler A                                                                      | "M.C.": "Excluded",<br>"K.C.": "Excluded",<br>Exclusion reason:<br>wrong publication<br>type | Not applicable                            |
| Two commentaries on interventions for the management of temporomandibular joint osteoarthritis.                                                                                                                            | 2013 | Patel DN and Manfredini D                                                                   | "M.C.": "Excluded",<br>"K.C.": "Excluded",<br>Exclusion reason:<br>wrong publication<br>type | Not applicable                            |
| An assessment of the usefulness of jaw kinesiography in monitoring temporomandibular disorders: correlation of treatment-related kinesiographic and pain changes in patients receiving temporomandibular joint injections. | 2013 | Manfredini D and Favero L and Michieli M and Salmaso L and Cocilovo F and Guarda-Nardini L  | "M.C.": "Excluded",<br>"K.C.": "Excluded",<br>Exclusion reason:<br>wrong drug                | Not applicable                            |
| Comparison of 2 hyaluronic acid drugs for the treatment of temporomandibular joint osteoarthritis.                                                                                                                         | 2012 | Guarda-Nardini L and Cadorin C and Frizziero A and Ferronato G and Manfredini D             | "M.C.": "Excluded",<br>"K.C.": "Excluded",<br>Exclusion reason:<br>wrong drug                | Not applicable                            |
| Treatment effectiveness of arthrocentesis plus hyaluronic acid injections in different age groups of patients with temporomandibular joint osteoarthritis.                                                                 | 2012 | Guarda-Nardini L and Olivo M and Ferronato G and Salmaso L and Bonnini S and Manfredini D   | "M.C.": "Excluded",<br>"K.C.": "Excluded",<br>Exclusion reason:<br>wrong drug                | Not applicable                            |
| Interventions for the management of temporomandibular joint osteoarthritis.                                                                                                                                                | 2012 | Macedo De Souza RF and Lovato da Silva CH and Nasser M and Fedorowicz Z and Al-Muharraqi MA | "M.C.": "Excluded",<br>"K.C.": "Excluded",<br>Exclusion reason:<br>wrong publication<br>type | Not applicable                            |
| [Glucosamine hydrochloride combined with hyaluronate for temporomandibular joint osteoarthritis: a primary report of randomized controlled trial].                                                                         | 2011 | Li C and Jia Y and Zhang Q and Shi Z and Chen H                                             | "M.C.": "Excluded",<br>"K.C.": "Excluded",<br>Exclusion reason:<br>foreign language          | Not applicable                            |
| Repeated sodium hyaluronate injections following multiple arthrocenteses in the treatment of early stage reducing disc displacement of the temporomandibular joint: a preliminary report.                                  | 2012 | Tuncel U                                                                                    | "M.C.": "Excluded",<br>"K.C.": "Excluded",<br>Exclusion reason:<br>wrong drug                | Not applicable                            |
| Two-needle vs. single-needle technique for TMJ arthrocentesis plus hyaluronic acid injections: a comparative trial over a six-month follow up.                                                                             | 2012 | Guarda-Nardini L and Ferronato G and Manfredini D                                           | "M.C.": "Excluded",<br>"K.C.": "Excluded",<br>Exclusion reason:<br>wrong drug                | Not applicable                            |
| [Hyaluronate sodium treatment for internal derangement of temporomandibular joint: a systematic review based on randomized controlled trials].                                                                             | 2011 | Li C and Zhang Y and Jia Y and Lü J and Li L and Shi ZD                                     | "M.C.": "Excluded",<br>"K.C.": "Excluded",<br>Exclusion reason:<br>foreign language          | Not applicable                            |
| A longitudinal study on the osteoarthritic change of the temporomandibular joint based on 1-year follow-up computed tomography.                                                                                            | 2012 | Lee JY and Kim DJ and Lee SG and Chung JW                                                   | "M.C.": "Excluded",<br>"K.C.": "Excluded",<br>Exclusion reason:<br>wrong drug                | Not applicable                            |
| Conservative treatment of severe limited mouth opening after transtemporal craniotomy.                                                                                                                                     | 2011 | Qing-Gong M and Si C and Xing L                                                             | "M.C.": "Excluded",<br>"K.C.": "Excluded",<br>Exclusion reason:<br>wrong population          | Not applicable                            |
| Prognostic indicators of the outcome of arthrocentesis with and without sodium hyaluronate injection for the treatment of disc displacement without reduction: a magnetic resonance imaging study.                         | 2010 | Aktas I and Yalcin S and Sencer S                                                           | "M.C.": "Excluded",<br>"K.C.": "Excluded",<br>Exclusion reason:<br>wrong drug                | Not applicable                            |
| Single-needle temporomandibular joint arthrocentesis with hyaluronic acid injections. Preliminary data after a five-injection protocol.                                                                                    | 2009 | Manfredini D and Guarda-Nardini L and Ferronato G                                           | "M.C.": "Excluded",<br>"K.C.": "Excluded",<br>Exclusion reason:<br>wrong drug                | Not applicable                            |
| Short-term effects of arthrocentesis plus viscosupplementation in the management of signs and symptoms of painful TMJ disc displacement with reduction. A pilot study.                                                     | 2010 | Guarda-Nardini L and Manfredini D and Ferronato G                                           | "M.C.": "Excluded",<br>"K.C.": "Excluded",<br>Exclusion reason:<br>wrong drug                | Not applicable                            |
| A randomized controlled trial of superior and inferior temporomandibular joint space injection with hyaluronic acid in treatment of anterior disc displacement without reduction.                                          | 2009 | Long X and Chen G and Cheng AH and Cheng Y and Deng M and Cai H and Meng Q                  | "M.C.": "Included",<br>"K.C.": "Included"                                                    | "M.C.": "Included",<br>"K.C.": "Included" |

|                                                                                                                                                                                 |      |                                                                                                                |                                                                                           |                                                                                       |
|---------------------------------------------------------------------------------------------------------------------------------------------------------------------------------|------|----------------------------------------------------------------------------------------------------------------|-------------------------------------------------------------------------------------------|---------------------------------------------------------------------------------------|
| Efficacy and safety of sodium hyaluronate in the treatment of Wilkes stage II disease.                                                                                          | 2008 | Oliveras-Moreno JM and Hernandez-Pacheco E and Oliveras-Quintana T and Infante-Cossio P and Gutierrez-Perez JL | "M.C.": "Included",<br>"K.C.": "Included"                                                 | "M.C.": "Excluded",<br>"K.C.": "Excluded",<br>Exclusion reason:<br>wrong outcome      |
| Total temporomandibular joint replacement: a clinical case with a proposal for post-surgical rehabilitation.                                                                    | 2008 | Guarda-Nardini L and Manfredini D and Ferronato G                                                              | "M.C.": "Excluded",<br>"K.C.": "Excluded",<br>Exclusion reason:<br>wrong publication type | Not applicable                                                                        |
| Arthrocentesis of the temporomandibular joint: a proposal for a single-needle technique.                                                                                        | 2008 | Guarda-Nardini L and Manfredini D and Ferronato G                                                              | "M.C.": "Excluded",<br>"K.C.": "Excluded",<br>Exclusion reason:<br>wrong drug             | Not applicable                                                                        |
| Osteoarthritis of the temporomandibular joint: an evaluation of the effects and complications of corticosteroid injection compared with injection with sodium hyaluronate.      | 2007 | Bjørnland T and Gjaerum AA and Møystad A                                                                       | "M.C.": "Included",<br>"K.C.": "Included"                                                 | "M.C.": "Included",<br>"K.C.": "Included"                                             |
| A one-year case series of arthrocentesis with hyaluronic acid injections for temporomandibular joint osteoarthritis.                                                            | 2007 | Guarda-Nardini L and Stifano M and Brombin C and Salmaso L and Manfredini D                                    | "M.C.": "Excluded",<br>"K.C.": "Excluded",<br>Exclusion reason:<br>wrong drug             | Not applicable                                                                        |
| Short-term therapeutic outcome of intra-articular high molecular weight hyaluronic acid injection for nonreducing disc displacement of the temporomandibular joint.             | 2006 | Yeung RW and Chow RL and Samman N and Chiu K                                                                   | "M.C.": "Included",<br>"K.C.": "Included"                                                 | "M.C.": "Included",<br>"K.C.": "Included"                                             |
| Changes in condylar mobility and radiographic alterations after treatment in patients with non-reducing disc displacement of the temporomandibular joint.                       | 2006 | Sato S and Kawamura H                                                                                          | "M.C.": "Excluded",<br>"K.C.": "Included"                                                 | "M.C.": "Included",<br>"K.C.": "Included"                                             |
| Conservative treatment of temporomandibular joint osteoarthrosis: intra-articular injection of sodium hyaluronate.                                                              | 2005 | Guarda-Nardini L and Masiero S and Marioni G                                                                   | "M.C.": "Included",<br>"K.C.": "Included"                                                 | "M.C.": "Excluded",<br>"K.C.": "Excluded",<br>Exclusion reason:<br>wrong intervention |
| [Influence of intra-articular injections of sodium hyaluronate on clinical features and synovial fluid nitric oxide levels of temporomandibular osteoarthritis].                | 2004 | Guarda Nardini L and Oliviero F and Ramonda R and Ferronato G                                                  | "M.C.": "Excluded",<br>"K.C.": "Excluded",<br>Exclusion reason:<br>foreign language       | Not applicable                                                                        |
| Pre- and posttreatment analysis of clinical symptoms of patients with temporomandibular disorders.                                                                              | 2004 | Babadağ M and Sahin M and Görgün S                                                                             | "M.C.": "Excluded",<br>"K.C.": "Included"                                                 | "M.C.": "Excluded",<br>"K.C.": "Excluded",<br>Exclusion reason:<br>wrong intervention |
| [An outcome analysis of two methods of intra-capsular injection of sodium hyaluronate for temporomandibular disorders].                                                         | 2004 | Li XD and Shi ZD and Tian WD                                                                                   | "M.C.": "Excluded",<br>"K.C.": "Excluded",<br>Exclusion reason:<br>foreign language       | Not applicable                                                                        |
| [Intraarticular injection-dilatation and later lavage plus viscosupplementation of TMJ for the treatment of anterior disc displacement without reduction].                      | 2004 | Zhong WQ and Zhou G                                                                                            | "M.C.": "Excluded",<br>"K.C.": "Excluded",<br>Exclusion reason:<br>foreign language       | Not applicable                                                                        |
| Analysis of kinesiograph recordings and masticatory efficiency after treatment of non-reducing disk displacement of the temporomandibular joint.                                | 2003 | Sato S and Nasu F and Motegi K                                                                                 | "M.C.": "Excluded",<br>"K.C.": "Included"                                                 | "M.C.": "Included",<br>"K.C.": "Included"                                             |
| Treatment of patients with arthrosis of the temporomandibular joint by infiltration of sodium hyaluronate: a preliminary study.                                                 | 2002 | Guarda-Nardini L and Tito R and Staffieri A and Beltrame A                                                     | "M.C.": "Excluded",<br>"K.C.": "Excluded",<br>Exclusion reason:<br>wrong drug             | Not applicable                                                                        |
| The efficacy of intra-articular sodium hyaluronate in patients with reducing displaced disc of the temporomandibular joint.                                                     | 2002 | Hepguler S and Akkoc YS and Pehlivan M and Ozturk C and Celebi G and Saracoglu A and Ozpinar B                 | "M.C.": "Included",<br>"K.C.": "Included"                                                 | "M.C.": "Excluded",<br>"K.C.": "Excluded",<br>Exclusion reason:<br>wrong outcome      |
| Pumping injection of sodium hyaluronate for patients with non-reducing disc displacement of the temporomandibular joint: two year follow-up.                                    | 2001 | Sato S and Oguri S and Yamaguchi K and Kawamura H and Motegi K                                                 | "M.C.": "Excluded",<br>"K.C.": "Included"                                                 | "M.C.": "Excluded",<br>"K.C.": "Excluded",<br>Exclusion reason:<br>wrong outcome      |
| Effect of pumping with injection of sodium hyaluronate and the other factors related to outcome in patients with non-reducing disk displacement of the temporomandibular joint. | 2001 | Sato S and Goto S and Kasahara T and Kawamura H and Motegi K                                                   | "M.C.": "Excluded",<br>"K.C.": "Included"                                                 | "M.C.": "Excluded",<br>"K.C.": "Excluded",<br>Exclusion reason:<br>wrong outcome      |
| Efficacy of temporomandibular joint arthrocentesis with and without injection of sodium hyaluronate in treatment of internal derangements.                                      | 2001 | Alpaslan GH and Alpaslan C                                                                                     | "M.C.": "Excluded",<br>"K.C.": "Excluded",<br>Exclusion reason:<br>wrong drug             | Not applicable                                                                        |

|                                                                                                                                                                                                                                                                                                                                                            |      |                                                                                                                                                                                           |                                                                                           |                                                                                  |
|------------------------------------------------------------------------------------------------------------------------------------------------------------------------------------------------------------------------------------------------------------------------------------------------------------------------------------------------------------|------|-------------------------------------------------------------------------------------------------------------------------------------------------------------------------------------------|-------------------------------------------------------------------------------------------|----------------------------------------------------------------------------------|
| Disc position and morphology in patients with nonreducing disc displacement treated by injection of sodium hyaluronate.                                                                                                                                                                                                                                    | 1999 | Sato S and Sakamoto M and Kawamura H and Motegi K                                                                                                                                         | "M.C.": "Included",<br>"K.C.": "Included"                                                 | "M.C.": "Excluded",<br>"K.C.": "Excluded",<br>Exclusion reason:<br>wrong outcome |
| Arthroscopic management of temporomandibular closed lock.                                                                                                                                                                                                                                                                                                  | 1998 | Miyamoto H and Sakashita H and Miyata M and Goss AN and Okabe K and Miyaji Y and Sakuma K                                                                                                 | "M.C.": "Excluded",<br>"K.C.": "Excluded",<br>Exclusion reason:<br>wrong drug             | Not applicable                                                                   |
| Intra-articular injection of hyaluronic acid reduces total amounts of leukotriene C4, 6-keto-prostaglandin F1alpha, prostaglandin F2alpha and interleukin-1beta in synovial fluid of patients with internal derangement in disorders of the temporomandibular joint.                                                                                       | 1998 | Hirota W                                                                                                                                                                                  | "M.C.": "Excluded",<br>"K.C.": "Excluded",<br>Exclusion reason:<br>wrong drug             | Not applicable                                                                   |
| Pressurized infusion of sodium hyaluronate for closed lock of the temporomandibular joint. Part I: A case study.                                                                                                                                                                                                                                           | 1993 | Fader KW and Grummons DC and Majer R and Christensen LV                                                                                                                                   | "M.C.": "Excluded",<br>"K.C.": "Excluded",<br>Exclusion reason:<br>wrong publication type | Not applicable                                                                   |
| Short-term effects of intra-articular sodium hyaluronate, glucocorticoid, and saline injections on rheumatoid arthritis of the temporomandibular joint.                                                                                                                                                                                                    | 1991 | Kopp S and Akerman S and Nilner M                                                                                                                                                         | "M.C.": "Included",<br>"K.C.": "Included"                                                 | Full text not available                                                          |
| Is Hyaluronic Acid or Corticosteroid Superior to Lactated Ringer Solution in the Short-Term Reduction of Temporomandibular Joint Pain After Arthrocentesis? Part 1.                                                                                                                                                                                        | 2017 | Bouloux GF and Chou J and Krishnan D and Aghaloo T and Kahenasa N and Smith JA and Giannakopoulos H                                                                                       | "M.C.": "Excluded",<br>"K.C.": "Excluded",<br>Exclusion reason:<br>wrong drug             | Not applicable                                                                   |
| Is Hyaluronic Acid or Corticosteroid Superior to Lactated Ringer Solution in the Short Term for Improving Function and Quality of Life After Arthrocentesis? Part 2.                                                                                                                                                                                       | 2017 | Bouloux GF and Chou J and Krishnan D and Aghaloo T and Kahenasa N and Smith JA and Giannakopoulos H                                                                                       | "M.C.": "Excluded",<br>"K.C.": "Excluded",<br>Exclusion reason:<br>wrong drug             | Not applicable                                                                   |
| Successful temporomandibular viscosupplementation protocol in a 47 year-old woman with a 10- year history of temporomandibular pain and impaired function- case report                                                                                                                                                                                     | 2019 | Januzzi, Eduardo and Almeida-Leite, Camila and Cunha, Thays and Fonseca, Roberta and Gonçalves, Rafael and Oliveira, Pedro and Grossman, Eduardo and Almeida, Andre                       | "M.C.": "Excluded",<br>"K.C.": "Excluded",<br>Exclusion reason:<br>wrong publication type | Not applicable                                                                   |
| Arthrocentesis associated with viscosupplementation in a case of anterior disc displacement and attachment in temporomandibular joint                                                                                                                                                                                                                      | 2019 | Januzzi, Eduardo and Grossmann, Eduardo and Cunha, Thays and Goncalves, Rafael and Almeida-Leite, Camila and Ferreira, Luciano and Carvalho, Paulo and Oliveira, Pedro and Almeida, Andre | "M.C.": "Excluded",<br>"K.C.": "Excluded",<br>Exclusion reason:<br>wrong drug             | Not applicable                                                                   |
| Estudio comparativo entre tratamiento con infiltraciones intraarticulares de betametasona, hialuronato de sodio y plasma rico en plaquetas en pacientes con artroalgia de la articulación temporomandibular                                                                                                                                                | 2020 | Macedo de Sousa, Bruno and López-Valverde Centeno, Antonio                                                                                                                                | "M.C.": "Excluded",<br>"K.C.": "Excluded",<br>Exclusion reason:<br>foreign language       | Not applicable                                                                   |
| Relato de caso de desordem temporomandibular articular refratária: a importância da abordagem multidisciplinar ; Case report of refractory temporomandibular joint disorder: the importance of a multidisciplinary approach ; Caso clínico de trastorno de la articulación temporomandibular refractaria: la importancia de un abordaje multidisciplinario | 2020 | Santos, Pablo Leal Teixeira and Lima, Fern and a Ferruzzi and Mazzetto, Marcelo Oliveira and Melchior, Melissa de Oliveira and Magri, Lais Valencise and Mori, Aline Akemi                | "M.C.": "Excluded",<br>"K.C.": "Excluded",<br>Exclusion reason:<br>foreign language       | Not applicable                                                                   |
| Interventions for managing temporomandibular joint osteoarthritis                                                                                                                                                                                                                                                                                          | 2012 | Lovato da Silva, Claudia H and Nasser, Mona and Fedorowicz, Zbys and Al-Muharraqi, Mohammed A and de Souza, Raphael F                                                                     | "M.C.": "Excluded",<br>"K.C.": "Excluded",<br>Exclusion reason:<br>wrong publication type | Not applicable                                                                   |
| Evaluation of the efficacy of the arthrocentesis associated with viscosupplementation in the treatment of the temporomandibular joint disorders: case report ; Avaliação da eficácia da artrocentese associada à viscosuplementação no tratamento das desordens temporomandibulares: relato de caso                                                        | 2020 | Stehling Urbano, Eduardo and Santiago, Rodrigo César and de Paula C and eia, Ana Júlia and Ferrante de Faria, Laís and de Cerqueira Luz, João Gualberto                                   | "M.C.": "Excluded",<br>"K.C.": "Excluded",<br>Exclusion reason:<br>foreign language       | Not applicable                                                                   |
| El ácido hialurónico y sus propiedades como adyuvantes para la terapia ortodóncica                                                                                                                                                                                                                                                                         | 2021 | Vélez Trujillo, Natalia Eugenia and Celis Londoño, Melissa and Vélez Trujillo, Natalia E.                                                                                                 | "M.C.": "Excluded",<br>"K.C.": "Excluded",<br>Exclusion reason:<br>foreign language       | Not applicable                                                                   |
| A Viscosuplementação com Ácido Hialurónico no Tratamento da Disfunção Temporomandibular.                                                                                                                                                                                                                                                                   | 2020 | Carvalho, Catarina da Costa and BRAZ, MARIA DO PRANTO VALENTE and ARAÚJO, TIAGO CAMPOS XAVIER DE                                                                                          | "M.C.": "Excluded",<br>"K.C.": "Excluded",<br>Exclusion reason:<br>foreign language       | Not applicable                                                                   |

|                                                                                                                                                                                                                                                                                                                                                              |      |                                                                                                                                                                                              |                                                                                           |                                                                                           |
|--------------------------------------------------------------------------------------------------------------------------------------------------------------------------------------------------------------------------------------------------------------------------------------------------------------------------------------------------------------|------|----------------------------------------------------------------------------------------------------------------------------------------------------------------------------------------------|-------------------------------------------------------------------------------------------|-------------------------------------------------------------------------------------------|
| Sequential infiltration of sodium hyaluronate in the temporomandibular joint with different molecular weights. Case report                                                                                                                                                                                                                                   |      | Eduardo Grossmann and Roberta Fonseca and Camila Almeida-Leite and Rafael Tardin Gonçalves and Pedro Gonçalves de Oliveira and Eduardo Januzzi                                               | "M.C.": "Excluded",<br>"K.C.": "Excluded",<br>Exclusion reason:<br>wrong publication type | Not applicable                                                                            |
| Prevalencia de los trastornos temporomandibulares en las historias clínicas de la clínica del adulto V del año 2017 al 2019 en la Universidad Santo Tomás de Bucaramanga                                                                                                                                                                                     | 2021 | Leal Jaimes, Camila Natalia and Guerrero Duarte, Juliana Marcela and Vergara Balaguera, Laura Jimena and Aristizábal Pérez, Jennifer and Toloza Ramírez, Emelina and Universidad Santo Tomás | "M.C.": "Excluded",<br>"K.C.": "Excluded",<br>Exclusion reason:<br>foreign language       | Not applicable                                                                            |
| The Effect of Intra-Articular Injection of Hyaluronic Acid on the Degenerative Pathology of the Temporo-Mandibular Joint                                                                                                                                                                                                                                     | 2017 | D, Batifol and P, Finiels and P, Jammet                                                                                                                                                      | "M.C.": "Included",<br>"K.C.": "Included"                                                 | "M.C.": "Included",<br>"K.C.": "Included"                                                 |
| Efficacy of arthrocentesis with injection of hyaluronic acid in the treatment of inflammatory-degenerative disease of temporomandibular joint                                                                                                                                                                                                                | 2021 | Enas A Abdulmageed and Thair Abdul Lateef                                                                                                                                                    | "M.C.": "Excluded",<br>"K.C.": "Excluded",<br>Exclusion reason:<br>wrong drug             | Not applicable                                                                            |
| Ultrasonography-guided invasive procedures of the temporomandibular joint                                                                                                                                                                                                                                                                                    | 2021 | Orhan, Kaan and Rozylo-Kalinowska, Ingrid                                                                                                                                                    | "M.C.": "Excluded",<br>"K.C.": "Included"                                                 | "M.C.": "Excluded",<br>"K.C.": "Excluded",<br>Exclusion reason:<br>wrong publication type |
| Evidência científica sobre o uso de ácido hialurônico no tratamento da disfunção temporo-mandibular                                                                                                                                                                                                                                                          | 2017 | Ferreira, Ana Lúcia Neves and Dias, Maria Carlos Real                                                                                                                                        | "M.C.": "Excluded",<br>"K.C.": "Excluded",<br>Exclusion reason:<br>foreign language       | Not applicable                                                                            |
| Temporomandibular eklem internal düzensizliklerinin tedavisinde sodyum hyalüronat enjeksiyonu ile birlikte yapılan artrosentez uygulaması ve konservatif tedavinin etkinliklerinin kıyaslanması ; Comparison of the efficacy of arthrocentesis with sodium hyaluronate injection and conservative treatment of temporomandibular joint internal derangements | 2007 | Küçük, Korhan and Ataoğlu, Hanife and Selçuk Üniversitesi, Sağlık Bilimleri Enstitüsü                                                                                                        | "M.C.": "Excluded",<br>"K.C.": "Excluded",<br>Exclusion reason:<br>foreign language       | Not applicable                                                                            |
| Evaluation of current treatment modalities for Management of Degenerative Temporomandibular joint diseases                                                                                                                                                                                                                                                   | 2020 | Awad Mansour, Heba Mahmoud                                                                                                                                                                   | "M.C.": "Excluded",<br>"K.C.": "Excluded",<br>Exclusion reason:<br>wrong publication type | Not applicable                                                                            |
| Efficacy of arthrocentesis with injection of hyaluronic acid in the treatment of internal derangement of temporomandibular joint                                                                                                                                                                                                                             | 2015 | Adil Al Kayat and Thair Abdul Lateef and Enas A Abdulmajed                                                                                                                                   | "M.C.": "Excluded",<br>"K.C.": "Excluded",<br>Exclusion reason:<br>wrong drug             | Not applicable                                                                            |
| Eficacia del hialuronato sódico como complemento de la artroscopia en la disfunción de la articulación temporomandibular                                                                                                                                                                                                                                     | 2014 | Morey Mas, Miguel Ángel and Universitat Autònoma de Barcelona. Departament de Cirurgia and Raspall, Guillermo, and Gonzalez Lagunas, Javier                                                  | "M.C.": "Excluded",<br>"K.C.": "Excluded",<br>Exclusion reason:<br>foreign language       | Not applicable                                                                            |
| Hijaluronska kiselina u dentalnoj medicini ; Use of hyaluronic acid in dentistry                                                                                                                                                                                                                                                                             | 2021 | Domislović, Petra and Šutej, Ivana                                                                                                                                                           | "M.C.": "Excluded",<br>"K.C.": "Excluded",<br>Exclusion reason:<br>foreign language       | Not applicable                                                                            |
| Semptomatik temporomandibular eklem internal düzensizliklerinde artrosentez ve artrosentez + hyalüronik asit uygulamasının temporomandibular eklem sinoviyal sıvısındaki önemli proenflamatuvar sitokin seviyeleri üzerine etkilerinin değerlendirilmesi                                                                                                     | 2012 | Özdamar, Saime Serap Moroğlu and Gürsoy, Bahar and Ağız Diş Çene Hastalıkları ve Cerrahisi Anabilim Dalı                                                                                     | "M.C.": "Excluded",<br>"K.C.": "Excluded",<br>Exclusion reason:<br>foreign language       | Not applicable                                                                            |
| Efficacy of Arthrocentesis with Injection of Hyaluronic Acid in the Treatment of Internal Derangement of Temporomandibular Joint                                                                                                                                                                                                                             | 2010 | Shakya, Pramila and Rahman, Quazi Billur and Hossain, Shakhawat and Akhter, Mahmuda and Uddin, Md Wares                                                                                      | "M.C.": "Excluded",<br>"K.C.": "Excluded",<br>Exclusion reason:<br>wrong drug             | Not applicable                                                                            |
| Platelet-Rich Plasma in Temporomandibular Joint Osteoarthritis Therapy: A 3-Month Follow-Up Pilot Study                                                                                                                                                                                                                                                      | 2013 | Machoň, V. and Řehořová, M. and Šedý, J. (Jiří) and Foltán, R.                                                                                                                               | "M.C.": "Included",<br>"K.C.": "Excluded"                                                 | "M.C.": "Excluded",<br>"K.C.": "Excluded",<br>Exclusion reason:<br>wrong intervention     |
| Valutazione clinica e radiologica degli effetti dell'artrocentesi nei disordini dell'articolazione temporo-mandibolare                                                                                                                                                                                                                                       | 2014 | Stimolo, Mirella and De Riu, Giacomo                                                                                                                                                         | "M.C.": "Excluded",<br>"K.C.": "Excluded",<br>Exclusion reason:<br>foreign language       | Not applicable                                                                            |



|                                                                                                                                                                                                               |      |                                                                                                                                                                                                                                                                                              |                                                                                           |                                                                                           |
|---------------------------------------------------------------------------------------------------------------------------------------------------------------------------------------------------------------|------|----------------------------------------------------------------------------------------------------------------------------------------------------------------------------------------------------------------------------------------------------------------------------------------------|-------------------------------------------------------------------------------------------|-------------------------------------------------------------------------------------------|
| Az állkapocsízületi károsodás kezelése szteroiddal, illetve hialuronsavval<br>= Intra-articular steroid and hyaluronic acid treatment of internal derangement of the temporomandibular joint                  | 2018 | Vingender, Szonja and Restár, László and Csomó, Krisztián Benedek and Schmidt, Péter and Hermann, Péter and Vaszilkó, Mihály                                                                                                                                                                 | "M.C.": "Excluded",<br>"K.C.": "Excluded",<br>Exclusion reason:<br>foreign language       | Not applicable                                                                            |
| Comparison of clinical outcomes of patients with nonreducing disc displacement treated by pumping and injection of sodium hyaluronate into the temporomandibular joint with or without mouth opening exercise | 2005 | Sato, S. and Yamaguchi, K. and Kawamura, K.                                                                                                                                                                                                                                                  | "M.C.": "Excluded",<br>"K.C.": "Included"                                                 | "M.C.": "Excluded",<br>"K.C.": "Excluded",<br>Exclusion reason:<br>wrong publication type |
| Artrosentez Vertigo Tedavisinde Bir Seçenek Olabilir mi?: Olgu Sunumu ;<br>Is Arthrocentesis a Choice for Treatment of Vertigo: A Case Report                                                                 | 2017 | KOCA, Cansu Gül and KOÇER, Gülperi and BÜLTE, Mert                                                                                                                                                                                                                                           | "M.C.": "Excluded",<br>"K.C.": "Excluded",<br>Exclusion reason:<br>foreign language       | Not applicable                                                                            |
| Tissue engineering: state of the art in oral rehabilitation                                                                                                                                                   | 2009 | Scheller, Erica L. and Krebsbach, Paul H. and Kohn, David H. and *<br>Department of Biologic and Materials Sciences, School of Dentistry, University of Michigan, Ann Arbor, MI and Department of Biomedical Engineering, College of Engineering, University of Michigan, Ann Arbor, MI, USA | "M.C.": "Excluded",<br>"K.C.": "Excluded",<br>Exclusion reason:<br>wrong publication type | Not applicable                                                                            |
| A mastication mechanism designed for testing temporomandibular joint implants                                                                                                                                 | 2012 | Ryan J. Frayne and Marvin Schwartz and James P. Dickey                                                                                                                                                                                                                                       | "M.C.": "Excluded",<br>"K.C.": "Excluded",<br>Exclusion reason:<br>wrong population       | Not applicable                                                                            |
| Heparin-Based Nanoparticles: An Overview of Their Applications                                                                                                                                                | 2018 | Maria del Pilar Rodriguez-Torres and Laura Susana Acosta-Torres and Luis Arm and o Diaz-Torres and Faheem Ahmed                                                                                                                                                                              | "M.C.": "Excluded",<br>"K.C.": "Excluded",<br>Exclusion reason:<br>wrong population       | Not applicable                                                                            |
